# Supplementary material for: Characterization of wavelength tunable lasers for use in wavelength packet switched networks
Source: Royal Society of Chemistry journal article supplement (doi:10.1039/b924208b), 2005-01-01
Supplement: b924208b.pdf [file b924208b.pdf]

## The effect of electrospray solvent composition on desorption electrospray ionisation (DESI) efficiency and spatial resolution

F. M. Green<sup>1</sup>, T. L. Salter<sup>1</sup>, I. S. Gilmore<sup>1</sup>, P. Stokes<sup>2</sup>, G. O'Connor<sup>2</sup>

1. National Physical Laboratory, Teddington, Middlesex TW11 0LW, UK

2. LGC, Teddington, Middlesex TW11 0LY, UK

\*Corresponding author: Tel: +44 (0)20 8943 6153; Fax: +44 (0)208 8943 6453; e-mail: [Felicia.Green@npl.co.uk](mailto:Felicia.Green@npl.co.uk)

### Electronic Supplementary material

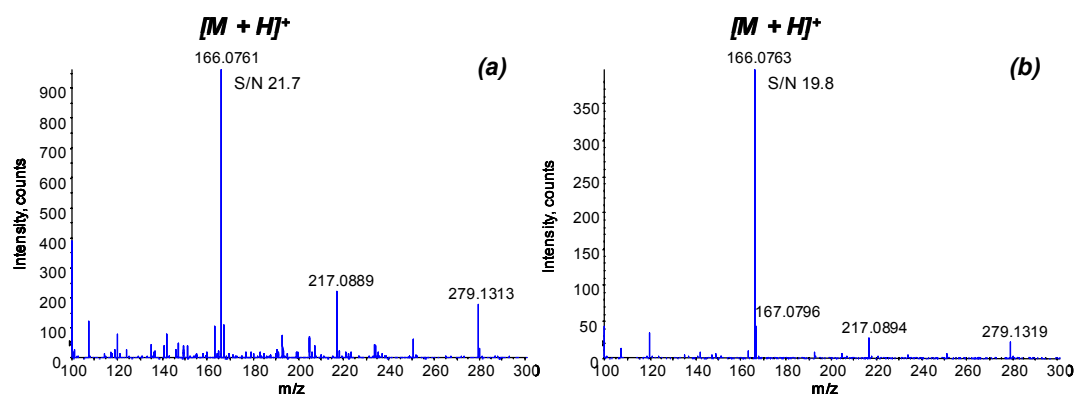

**Figure – DESI mass spectra of phenylalanine obtained for 30 s with an electrospray organic solvent fraction of 0.5 ACN in water from substrates of (a) IPA cleaned glass and (b) PTFE.**
